1 **Title: Prediction of the Epidemic Peak of Covid19 in Egypt, 2020**

2 **Author:** Eman D.El Desouky

3 Epidemiology and Biostatistics, National Cancer Institute, Cairo University,  
4 eman.desouky@nci.cu.edu.eg

5

6 **Address:** Kasr Al Eini ‘Street ‘Fom El Khalig ‘Cairo Governorate,

7 **Postal code:** 11796

# 1 **Prediction of the Epidemic Peak of Covid19 in Egypt, 2020**

## 2 **Abstract**

3 **Objectives:** Since December 2019 a pandemic of new novel coronavirus has started from  
4 Wuhan, China, in Egypt, the first case reported on February 14, 2020. In this study we  
5 aimed to predict the time of possible peak and simulate the changes could be happen by  
6 the social behavior of Egyptians during Ramadan (the holy month).

7  
8 **Methods:** SIR and SEIR compartmental models were used to predict the peak time. We  
9 simulated different expected scenarios based to examine their effects on the peak timing.

10 **Results:** We found that the peak most likely to be in middle of June 2020. Simulating  
11 different transmission rate probability and R0 the earliest peak could to be in the May 20  
12 and latest one could be in 18 July. The peak shifted much earlier to 11<sup>th</sup> April 2020  
13 without lockdown and other mitigation strategies.

14 **Conclusion:** Social behaviors of citizens during the holy month will dramatically affect  
15 the peak timing. Mitigations strategies and other lockdown measure helped to delay the  
16 expected peak.

17 **Keywords:** COVID-19; compartmental models; Epidemic peak; Egypt

18

## 1 **Introduction**

2 The first case of respiratory disease caused by a novel coronavirus was identified in  
3 Wuhan City, Hubei Province, China in In December 2019 and on 13 January 2020 the  
4 first case outside of China was reported in Thailand.<sup>1</sup> On 11<sup>th</sup> March 2020 the World  
5 Health Organization named it coronavirus disease 2019 (COVID-19) and considered as  
6 pandemic.<sup>2</sup> The first case appeared in Egypt on 14<sup>th</sup> February 2020 for a foreigner and  
7 fortunately was asymptomatic until 1<sup>st</sup> of March 2020 he was the only reported case after  
8 that few cases started to appear till 14<sup>th</sup> March 2020 to reach 110 cumulatively, and then  
9 the number of laboratory confirmed cases increased weekly (Table 1) to reach 3490 till  
10 April 22, 2020.<sup>3</sup>

11 **Table 1. Number of cumulative COVID-19 cases in Egypt until 23<sup>th</sup> April 2020**

| ...                      | No of Cumulative cases |
|--------------------------|------------------------|
| 14 February -20 February | 1                      |
| 21 February -27 February | 1                      |
| 28 February -5 March     | 1                      |
| 6 March -12 March        | 3                      |
| 13 March -19 March       | 80                     |
| 20 March -26 March       | 256                    |
| 27 March -2 April        | 495                    |
| 3 April - 9 April        | 865                    |
| 10 April-16 April        | 1699                   |
| 17 April-22 April        | 3490                   |

12  
13  
14 As seen in table 1 the numbers started nearly to double weekly from the fifth week and  
15 after closure of schools with partial lockdown the public concerned about the timing of  
16 the cases surge. The aim of this study is to predict the time of possible peak and simulate  
17 the changes that might happen by the social behavior of Egyptians during Ramadan (the  
18 holy month) that will begins on Friday April 24 and ends on Saturday May 23. In  
19 Ramadan families usually gather especially in first days , children have more activates  
20 with each other's and everyone leaves work at the same time and need to be in home at  
21 the same time ; currently with Covid19 pandemic and partial lock down it's challenging  
22 to cope with social distancing and Ramadan habits .

23  
24

1 **Methods:**

2 We tested two models SIR and SEIR models <sup>4</sup> to predict peak timing using data till 17th  
 3 April 2020 and simulated different scenarios based on hypothetical expected changes in  
 4 social behavior of Egyptians during Ramadan .

5 **1- SIR model**

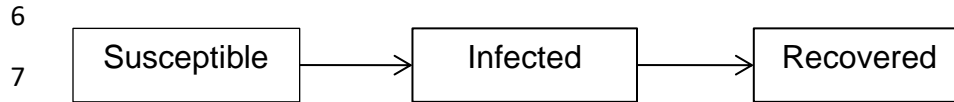

$$\begin{cases} S'(t) = -\beta S(t)I(t), \\ I'(t) = \beta S(t)I(t) - \gamma I(t), \\ R'(t) = \gamma I(t), \\ t > 0 \end{cases}$$

9

10 **2- SEIR model**

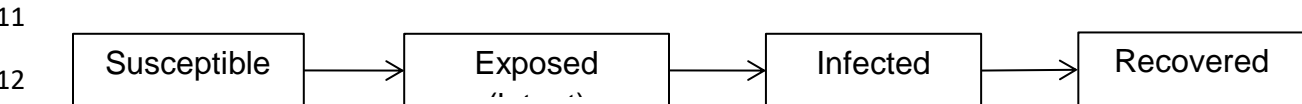

$$\begin{cases} S'(t) = -\beta S(t)I(t), & E'(t) = \beta S(t)I(t) - \varepsilon E(t), \\ I'(t) = \varepsilon E(t) - \gamma I(t), & R'(t) = \gamma I(t), \\ t > 0, \end{cases}$$

14

15 Where  $S(t)$ ,  $E(t)$ ,  $I(t)$  and  $R(t)$  represent the susceptible, exposed, infective and removed  
 16 populations at time  $t$ , respectively.  $\beta$ ,  $\varepsilon$  and  $\gamma$  represent the infection rate, the onset rate  
 17 and the removal rate, respectively.  $1/\varepsilon$  and  $1/\gamma$  imply the average incubation period and  
 18 the average infectious period, respectively. The force of infection (rate of infection per  
 19 unit time is  $\beta I$  and  $\beta$  denoted the rate of transmission from  $S$  to  $I$  or effective contact  
 20 between  $S$  and  $I$ .<sup>5</sup>

21 These models based on Euler`s Method: A numerical method for solving differential  
 22 equations and referred to as a compartment model since it is useful to refer to people  
 23 moving from one compartment to another.

24 Parameters used in the models based on previous studies assuming average Incubation  
 25 period = 5 days and so onset rate  $\varepsilon= 0.2$  <sup>6</sup>, assuming infectious period = 10 day and so  
 26 removal rate  $\gamma=0.1$ .<sup>7</sup> Egypt population  $(1 \times 10^8)$  <sup>8</sup>, no one infected at the time  $(t_0)$  time step  
 27 is one day and population remain constant so  $S \pm E + I + R = 1$ .

1 Regarding transmission rate ( $\beta$ ) and Basic reproduction number ( $R_0$ ) researcher depended  
2 on the published data available on GitHub, midas-network<sup>9</sup>,  $R_0$  for Egypt as published  
3 2.3 and so  $\beta=0.23$  by applying the formula;

$$4 \quad R_0 = \frac{\beta}{\gamma}$$

5 For the purpose of simulation different scenario of effective contacts during Ramadan,  
6 different  $R_0$  and  $\beta$  were used within the range of previous published data available on  
7 midas-network.<sup>9</sup>

8 Starting from model1 (M1) that represent less effective contact rate than the current  
9 situation ( $\beta=0.22$ ,  $R_0=2.2$ ) till model10 (M10) that represent higher effective contact rate  
10 with  $\beta=0.32$  and  $R_0=3.2$

11 The peak was identified by the maximum proportion of population infected in a year

12

### 13 **Results**

14

15 Researcher used SIR model with different simulation scenarios to predict peak timing,  
16 illustrated in figure1. The earliest of peak could be on May 20, 2020 and latest peak could  
17 be July 18, 2020, then applied Applying regression method to estimate the best fitted  
18 models with the cumulative data released by MOHP till 17th April, 2020; peak on 15  
19 June 2020 is more likely.

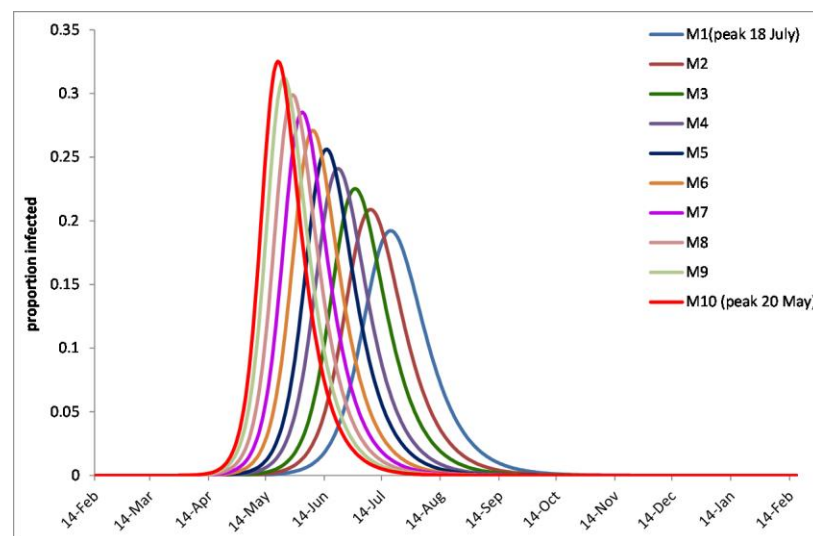

20

21 **Figure (1): Different models estimating different peaks with SIR model**

22

1 Researcher used SEIR Peak prediction models almost similar results obtained; earliest  
2 peak could be May 17, 2020 and latest peak could be by July 15, 2020.

3  
4 The 3<sup>rd</sup> scenario was estimating the peak time without lockdown and other strategies  
5 based on mobility changes report released by google<sup>11</sup> that stated average 50% reduction  
6 in Egypt since the time of lockdown and mitigation strategies. The peak was estimated to  
7 occur on 11<sup>th</sup> April 2020 but with mitigation strategies and lockdown it was shifted about  
8 69 days to reach June 15, 2020 (figure 2).

9

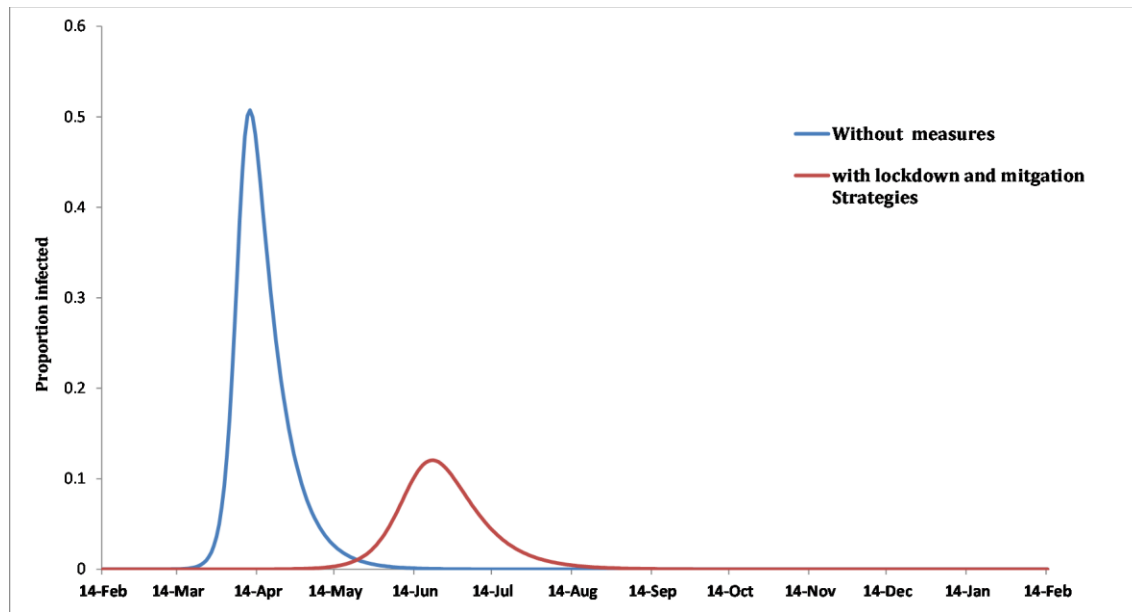

10  
11

12 **Figure (2): Peak estimation with lockdown and other measures in comparison to the**  
13 **situation without them.**

14

### 15 **Discussion**

16 In this study, by applying the SIR and SEIR compartmental model along with the daily  
17 reported cases of Covid19 till 17<sup>th</sup> April in Egypt; we estimated the peak could be in the  
18 middle of June. We hypothesized that the social and contact rate per individual changes  
19 in Ramadan (the Holy month) that will start on April 24, 2020 will affect the timing of  
20 peak as a result of Increase in  $\beta$  (transmission rate). We simulated different situations  
21 with different rates of effective contact, transmission rate and  $R_0$  consequently; the peak  
22 timing changed to reach 20 May, 2020 as earliest one and latest peak could be July 18,  
23 2020. These findings was in concordance with the study done by **Pearns et al**<sup>12</sup> that

1 reported 10,000 cases could be in 20 May 2020. On the contrast a recent report released  
2 by **SUTD Data-Driven Innovation Lab**<sup>13</sup> that reported the pandemic will end in Egypt  
3 on May 20, 2020. Researcher simulated another scenario based on current data to predict  
4 the timing of peak without lockdown the peak shifted earlier to be on April 11, 2020; the  
5 mitigation strategies helped to delay peak. The current study simulated different  
6 scenarios based on different values on transmission rate (calculated and estimated) in  
7 concordance with **Bootsma and Ferguson**<sup>14</sup> who stated the most important factor  
8 affecting disease pandemic is the transmission rate which depend on crowding as it  
9 affects amount of contact per individual. The current study used SIR and SEIR models  
10 which are too idealistic for modeling COVID-19 through numerical simulation, but it  
11 gives an idea about when the COVID-19 cases can surge to.<sup>15</sup>

12 The study stated long range peak prediction to emphasis the role of social distancing to  
13 flatten the curve in concordance with **Anderson et al**<sup>16</sup>.

14 The result suggests that the epidemic of COVID-19 in Egypt would not end so quickly.  
15 This might be reliable with the WHO's statement on 6 March 2020 that it is a false hope  
16 that COVID-19 will disappear in the summer like the flu.<sup>17</sup>

### 17 **Limitations**

18 This is too idealistic for modeling COVID-19 as the reproduction number ( $R_0$ ) changes  
19 overtime but the multiple simulation may overcome this hypothetically for certain time.  
20 The deterministic models are not accurate and used to give insight about what will  
21 happen to population on average. Study didn't estimate the hospitalized number at the  
22 surge however the timing of the peak didn't affected by the identified cases form the  
23 actual infective population.

### 24 **Conclusions:**

25 During COVID-19 pandemic it's hard to predict the real peak timing however the surge  
26 timing will depend mainly on the behavior of citizens towards social distancing and  
27 hygiene measures. The mitigation strategies and lockdown in Egypt has a positive effect  
28 on the delay of the epidemic peak, giving more time to the health sector to encompass the  
29 situation. There is an urgent need for Local and worldwide policy to deal with Covid19  
30 that will extend to summer time. Egyptian government should monitor the reported cases  
31 daily along with the performance of citizens in the coming month to determine the proper

1 strategies to flatten the curve as much as possible. The optimistic view to the situation  
2 should be treated cautiously as COVID-19 is still unclear.

3  
4 **Declaration of interests:** The author declares no competing interests.  
5

6  
7 **Reference**

- 8 1 CDC, Coronavirus Disease 2019 (COVID-19).  
9 <https://www.cdc.gov/coronavirus/2019-ncov/index.html>. Accessed 20 Apr 2020  
10
- 11 2 WHO, Coronavirus disease 2019.  
12 <https://www.who.int/emergencies/diseases/novel-coronavirus-2019>. Accessed 20 Apr  
13 2020
- 14 3 Egypt cares. 2020. Available from:  
15 <https://www.care.gov.eg/EgyptCare/Index.aspx> Accessed 22 Apr 2020
- 16 4 Inaba, H. Age-Structured Population Dynamics in Demography and Epidemiology;  
17 Springer: Berlin/Heidelberg, Germany, 2017.
- 18 5 Abbey H. An examination of the Reed-Frost theory of epidemics. Human biology.  
19 1952 Sep 1;24(3):201.
- 20 6 Linton NM, Kobayashi T, Yang Y, Hayashi K, Akhmetzhanov AR, Jung SM,  
21 Yuan B, Kinoshita R, Nishiura H. Incubation period and other epidemiological  
22 characteristics of 2019 novel coronavirus infections with right truncation: a statistical  
23 analysis of publicly available case data. Journal of clinical medicine. 2020 Feb;9(2):538.  
24
- 25 7 Sun H, Qiu Y, Yan H, Huang Y, Zhu Y, Chen SX. Tracking and Predicting  
26 COVID-19 Epidemic in China Mainland. medRxiv. 2020 Jan 1.  
27
- 28
- 29 8 CAPMAS. <https://www.capmas.gov.eg/Pages/populationClock.aspx>. Accessed 22  
30 Apr 2020  
31
- 32 9 COVID-19/README.md at master · midas-network/COVID-19.  
33 [https://github.com/midas-network/COVID-19/blob/master/parameter\\_estimates/2019\\_novel\\_coronavirus/README.md](https://github.com/midas-network/COVID-19/blob/master/parameter_estimates/2019_novel_coronavirus/README.md). Accessed  
34 17 Apr 2020  
35  
36
- 37 10 Ridenhour B, Kowalik JM, Shay DK. Unraveling R 0: Considerations for Public  
38 Health Applications. American journal of public health. 2018 Dec;108(S6):S445-54.  
39



- 1 11 COVID-19 Community Mobility Report.  
2 [https://www.gstatic.com/covid19/mobility/2020-04-11\\_EG\\_Mobility\\_Report\\_en.pdf](https://www.gstatic.com/covid19/mobility/2020-04-11_EG_Mobility_Report_en.pdf).  
3 Accessed 20 Apr 2020  
4  
5
- 6 12 Pearson CA, Van Schalkwyk C, Foss AM, O'Reilly KM, Pulliam JR,. Projected  
7 early spread of COVID-19 in Africa. CMMID COVID-19 working group 2020. 63:25–28
- 8 13 SUTD Data-Driven Innovation Lab. “Egypt.” *Data-Driven Prediction of COVID-*  
9 *19 Pandemic End Dates*, [ddi.sutd.edu.sg/portfolio/items/442705](http://ddi.sutd.edu.sg/portfolio/items/442705). Accessed 23 Apr 2020
- 10 14 Bootsma MC, Ferguson NM. The effect of public health measures on the 1918  
11 influenza pandemic in US cities. *Proceedings of the National Academy of Sciences*. 2007  
12 May 1;**104**(18):7588-93.  
13
- 14 15 Wees J Van, Osinga S, Kuip M Van Der, Tanck M, Hanegraaf M, Pluymaekers  
15 M, et al. Forecasting hospitalization and ICU rates of the COVID-19 outbreak: an  
16 efficient SEIR model. [Submitted]. *Bulletin World Health Organization*. E-pub: 30  
17 March 2020. doi: <http://dx.doi.org/10.2471/BLT.20.256743>  
18
- 19 16 Anderson RM, Heesterbeek H, Klinkenberg D, Hollingsworth TD. How will  
20 country-based mitigation measures influence the course of the COVID-19 epidemic? *The*  
21 *Lancet*. 2020 Mar 21;395(10228):931-4.
- 22 17 “False hope” coronavirus will disappear in summer like flu, WHO says. Available  
23 from: [https://www.cnbc.com/2020/03/06/its-a-false-hope-coronavirus-will-disappear-in-](https://www.cnbc.com/2020/03/06/its-a-false-hope-coronavirus-will-disappear-in-the-summer-like-the-flu-who-says.html)  
24 [the-summer-like-the-flu-who-says.html](https://www.cnbc.com/2020/03/06/its-a-false-hope-coronavirus-will-disappear-in-the-summer-like-the-flu-who-says.html). Accessed 18 Apr 2020.  
25
